# Supplementary material for: m6A Modified Short RNA Fragments Inhibit Cytoplasmic TLS/FUS Aggregation Induced by Hyperosmotic Stress
Source: MDPI journal article supplement (doi:10.3390/ijms222011014), 2021-10-12
Supplement: s1 [file s1]

Supplementary Materials Figure S1

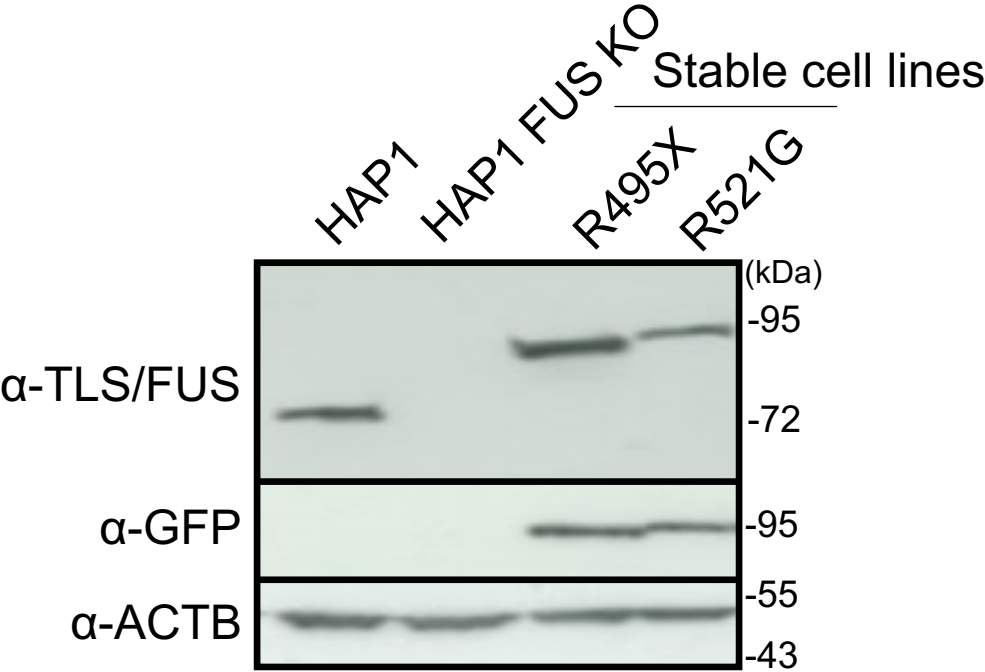

Figure S1. Western blot analysis with whole cell extract of HAP1, HAP1 FUS-KO, and GFP-TLS/FUS mutants expressing stable cell lines. Antibody against TLS/FUS, GFP, and ACTB (as a loading control) was used as primary antibodies.

# Supplementary Materials Figure S2

WT HAP1 cells treated with 0.4M sorbitol

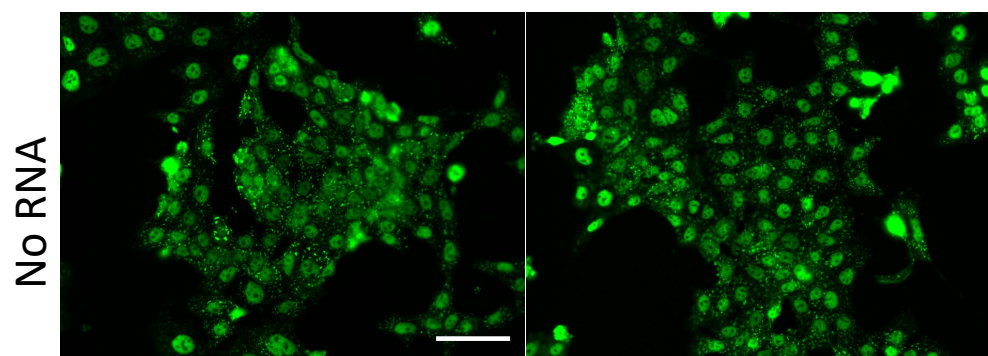

Fragment 3

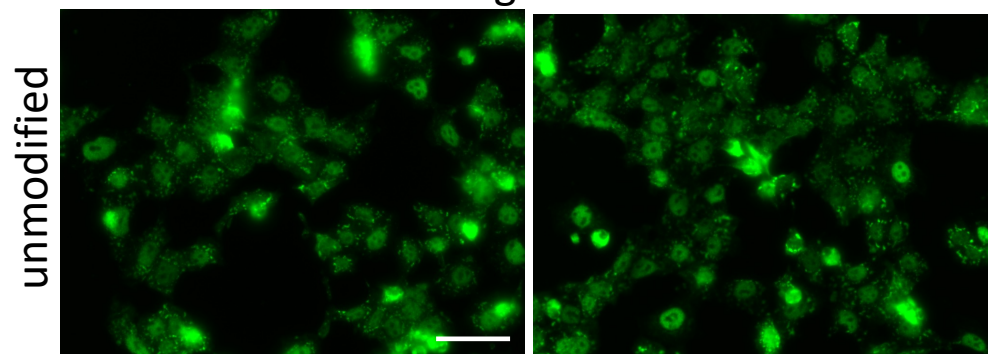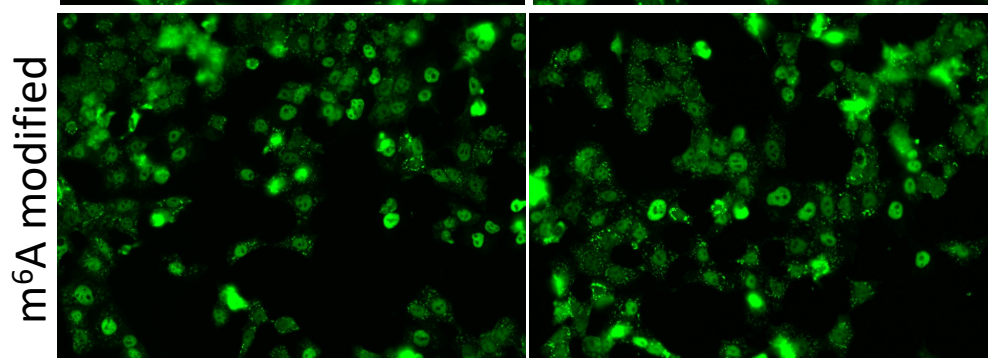

Fragment 6

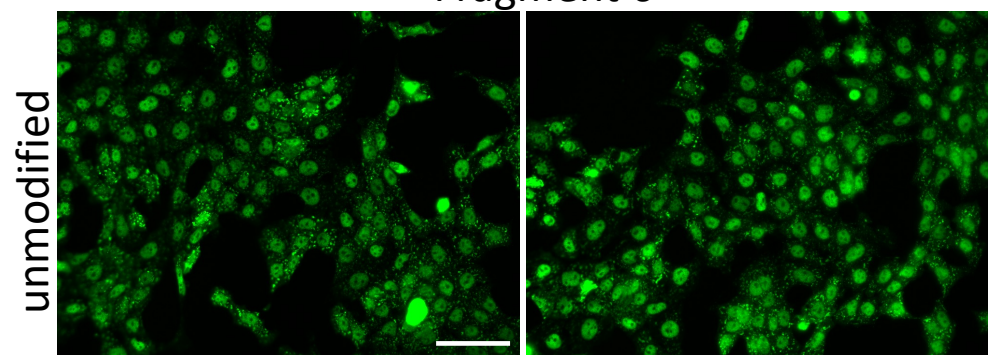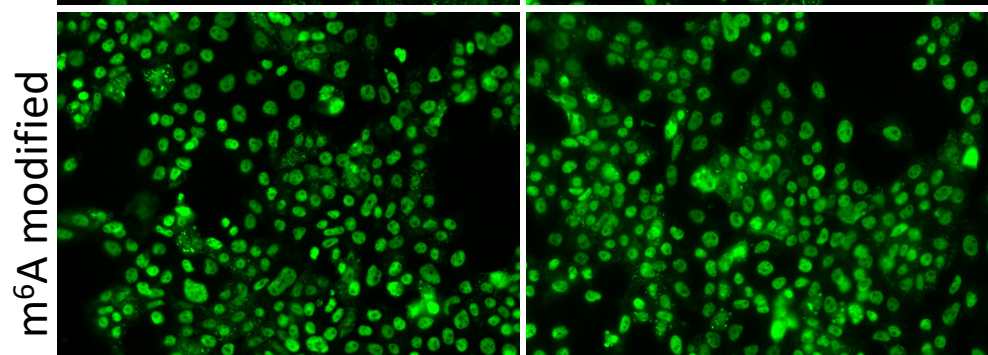

Figure S2. Sample images of ICC detecting TLS/FUS signals of HAP1 cells transfected with indicated RNA fragments prior to 0.4M sorbitol treatment. The images were used for quantification in Figure 3D and 3E. Scale bars = 50  $\mu$ m.

# Supplementary Materials Figure S3

**A**

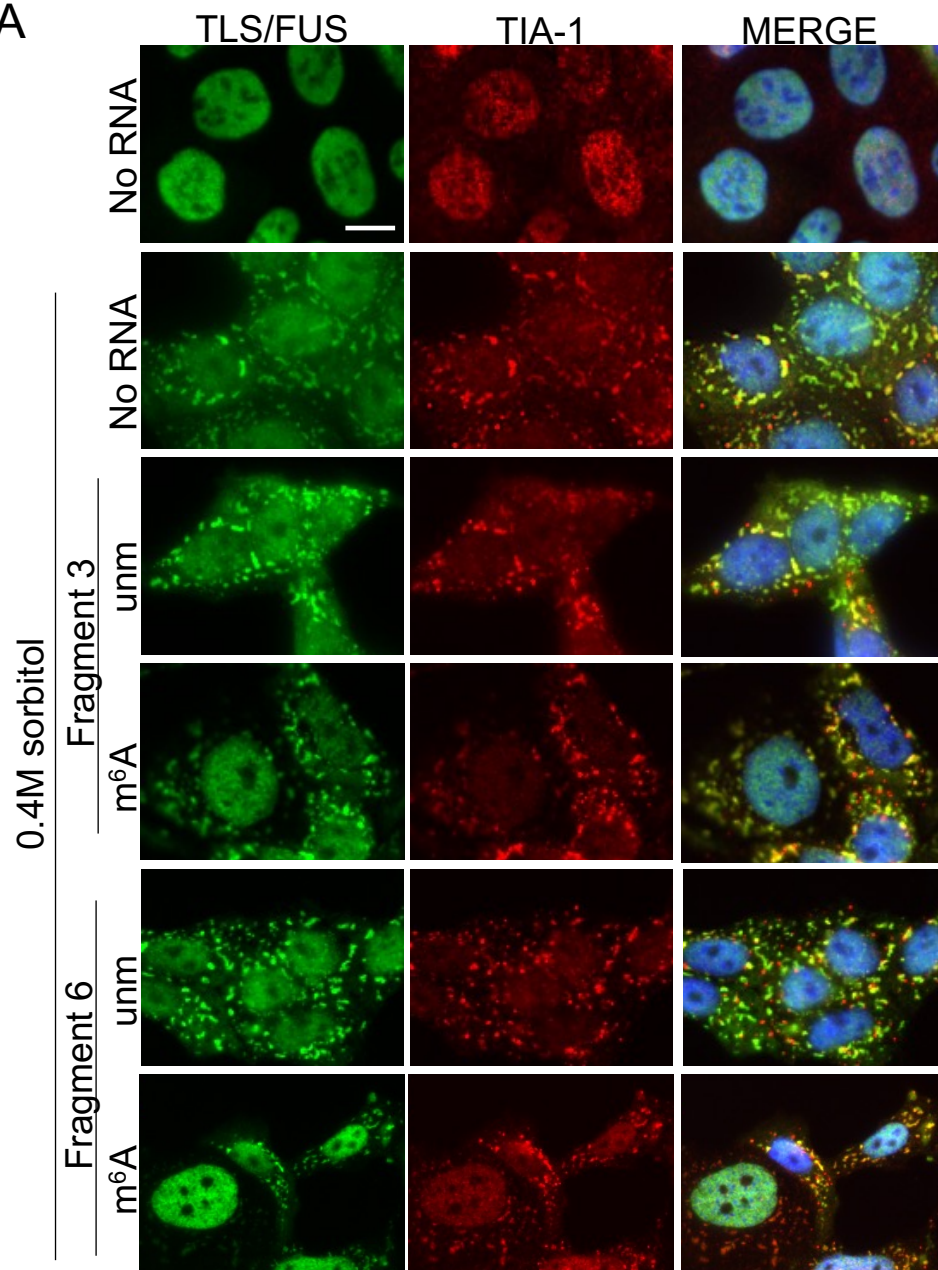

**B**

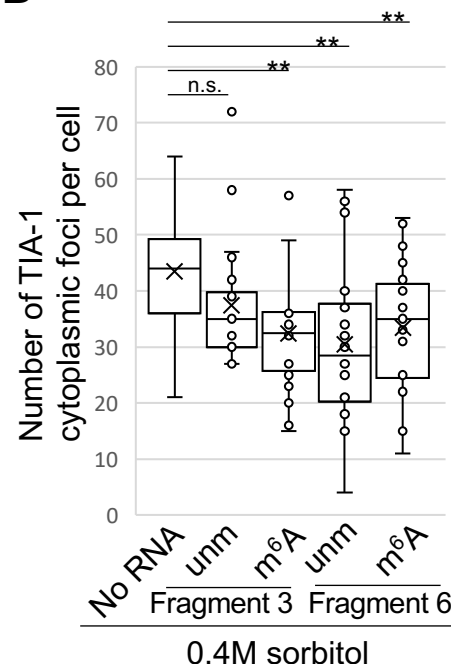

**C**

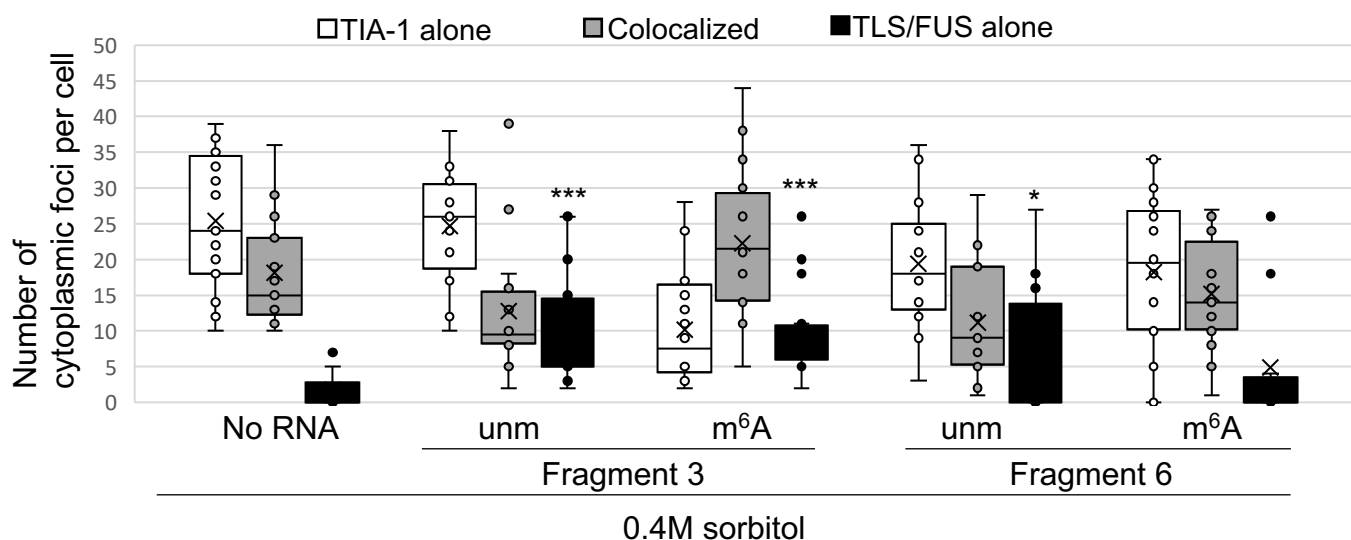

Figure S3. Stress granule formation induced by sorbitol treatment was reduced by transfection of RNA fragments. (A) RNA Fragment 3 or 6 (with or without m<sup>6</sup>A modification) were transfected to HAP1 cells prior to 0.4M sorbitol treatment. Representative images of ICC are shown. MERGE images indicate the layered images of TLS/FUS, TIA-1 and DAPI (for nuclei staining). Scale bar = 10  $\mu$ m. (B and C) Cytoplasmic foci in (A) were quantified.  $n = 20$ . n.s., not significant; unmodified fragment; m<sup>6</sup>A, m<sup>6</sup>A modified fragment. \* $p < 0.05$ , \*\* $p < 0.01$ , \*\*\* $p < 0.005$ .

GFP-R521G stable cell line treated with 0.4M sorbitol

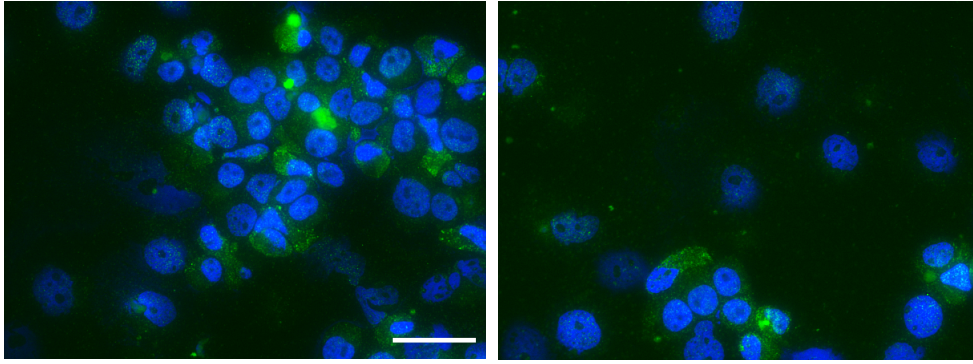

Figure S4. Sample images of GFP signals of stable cell line expressing GFP-R521G treated with 0.4M sorbitol. Scale bar = 30  $\mu$ m.



Supplementary Materials Figure S5  
GFP-R495X stable cell line treated with 0.4M sorbitol

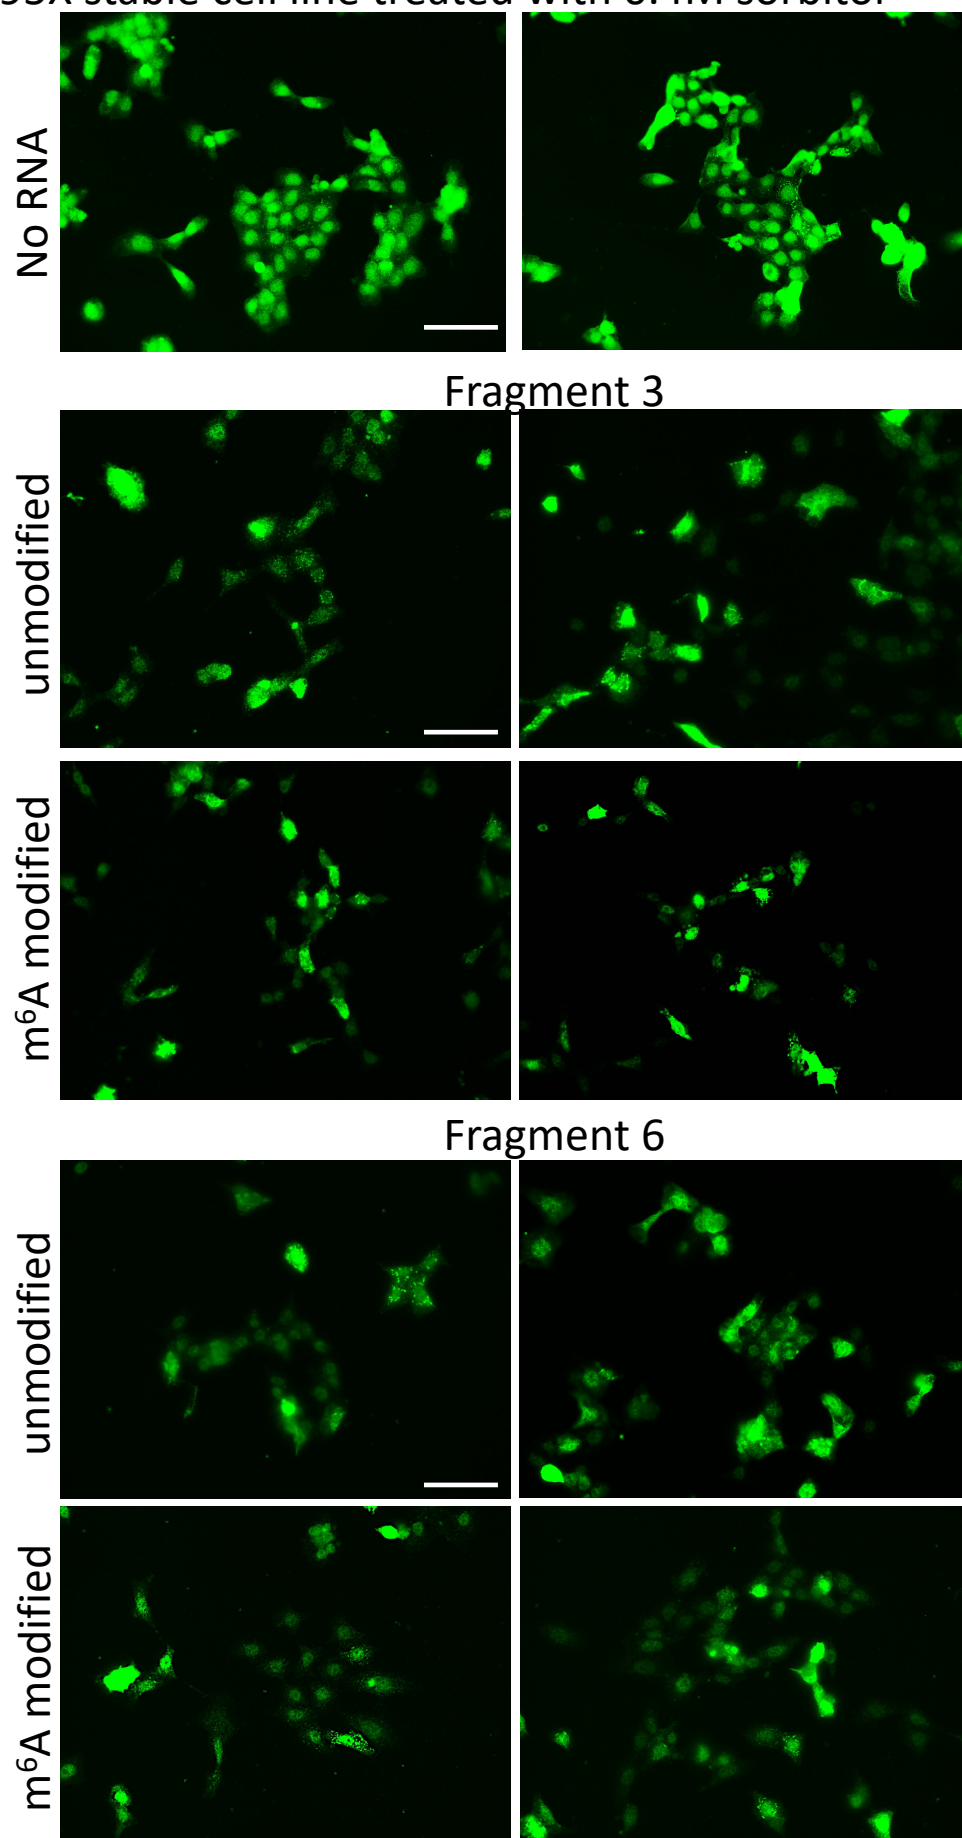

Figure S5. Sample images of GFP signals of stable cell line expressing GFP-R495X transfected with indicated RNA fragments prior to 0.4M sorbitol treatment. The images were used for quantification in Figure 4B and 4C. Scale bars = 50  $\mu$ m.

Supplementary Materials Figure S6

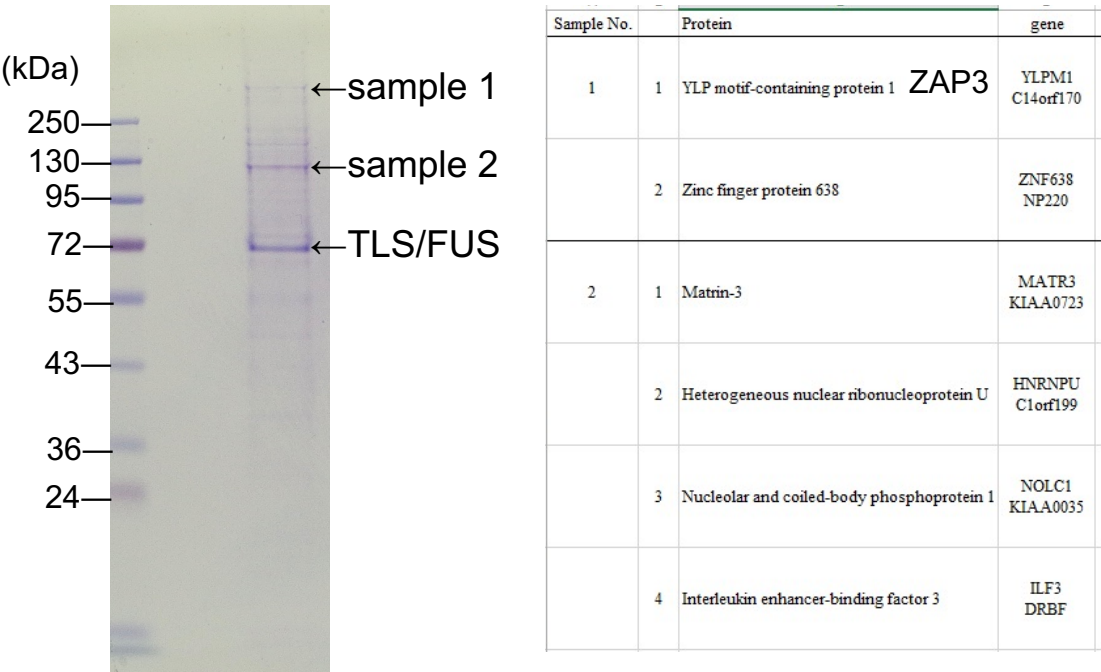

Figure S6. CBB staining after coimmunoprecipitation assay of TLS/FUS antibody incubated with nuclear extract. Bands indicated as sample 1 and 2 were cut out and mass spectrometry analysis predicted the proteins in the right table.

A

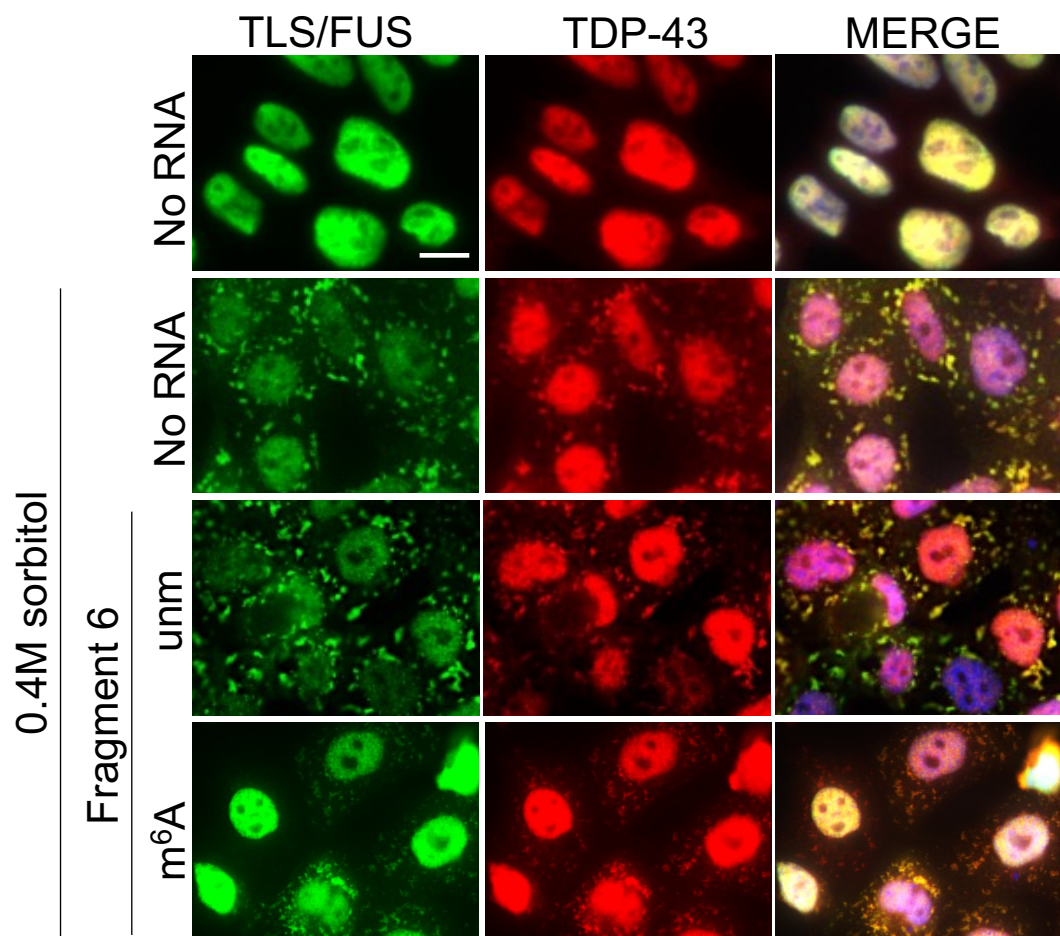

B

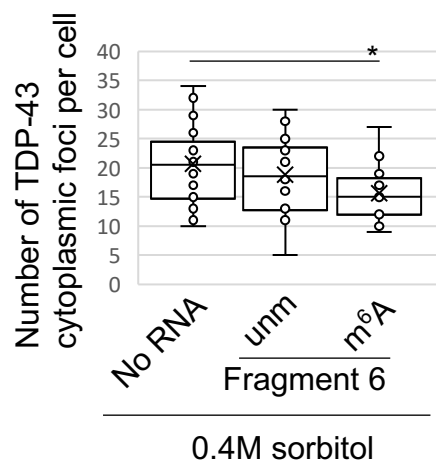

C

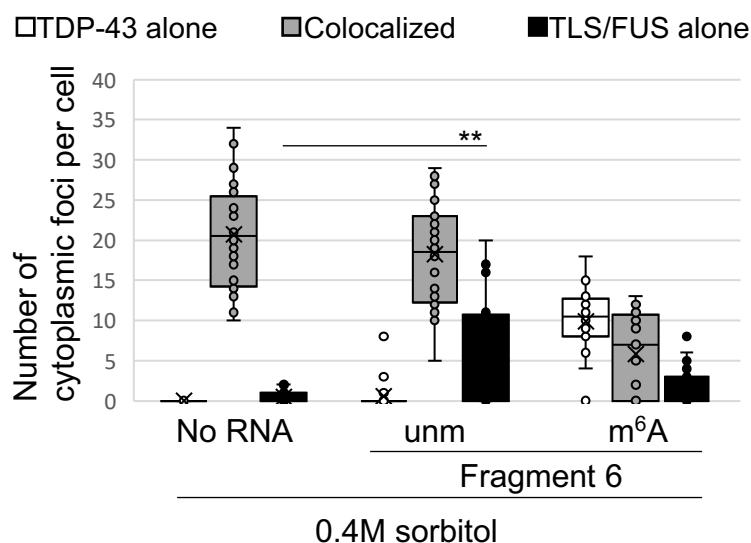

Figure S7. TDP-43 colocalized with cytoplasmic TLS/FUS foci after sorbitol treatment, but m<sup>6</sup>A modified RNA fragment impaired this colocalization. RNA Fragment 6 with or without m<sup>6</sup>A modification were transfected to HAP1 cells prior to 0.4M sorbitol treatment. Representative images of ICC are shown. MERGE images indicate the layered images of TLS/FUS, Matrin3 and DAPI (for nuclei staining). Scale bar = 10  $\mu$ m. (B and C) Cytoplasmic foci in (A) were quantified.  $n = 20$ . unmodified fragment; m<sup>6</sup>A, m<sup>6</sup>A modified fragment. \* $p < 0.05$ , \*\* $p < 0.01$ .

Supplementary Materials Figure S8

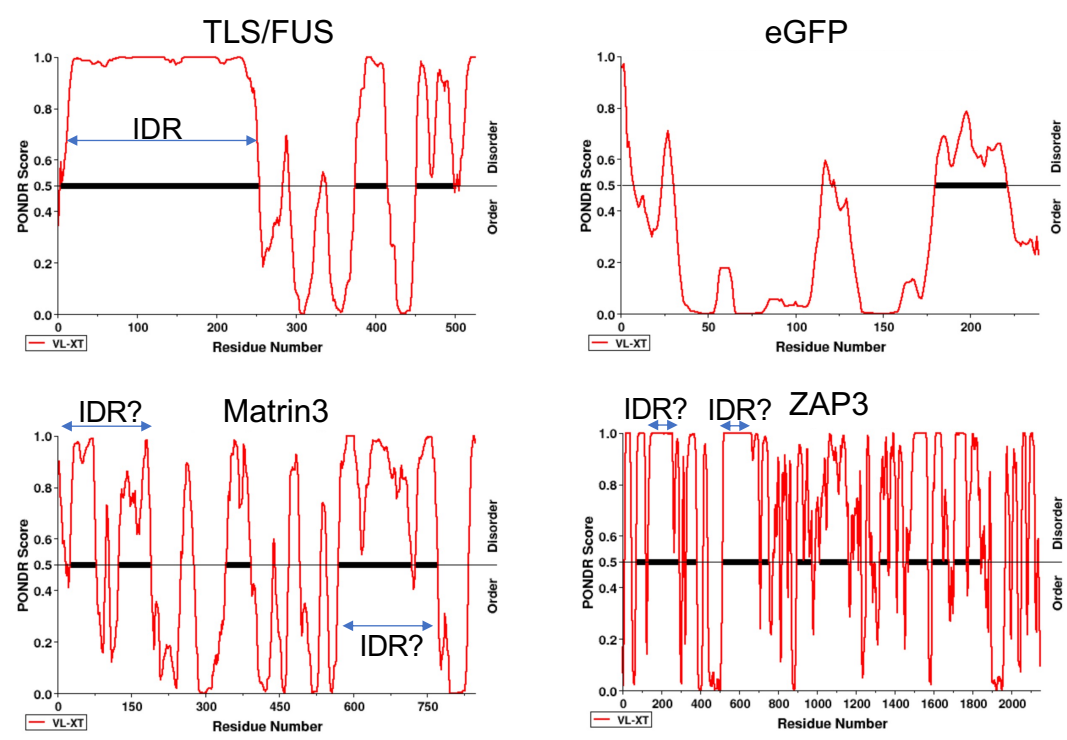

Figure S8. IDRs of TLS/FUS, Matrin3, ZAP3, and eGFP were prediction by PONDR. eGFP was analyzed as a representative structured protein.
